# Supplementary material for: Characterization of the particle emission from a ship operating at sea using an unmanned aerial vehicle
Source: Copernicus journal article supplement (doi:10.5194/amt-12-691-2019), 2019-01-31
Supplement: Supplementary file 1 [file amt-12-691-2019-supplement.pdf]

Supplement of Atmos. Meas. Tech., 12, 691–702, 2019  
<https://doi.org/10.5194/amt-12-691-2019-supplement>  
© Author(s) 2019. This work is distributed under  
the Creative Commons Attribution 3.0 License.

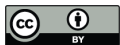

*Supplement of*

## **Characterization of the particle emission from a ship operating at sea using an unmanned aerial vehicle**

**Tommaso F. Villa et al.**

*Correspondence to:* Zoran D. Ristovski (z.ristovski@qut.edu.au)

The copyright of individual parts of the supplement might differ from the CC BY 3.0 License.

1 The DISCmini was compared with a reference CPC (TSI 3772) for ambient measurements onboard the  
2 ship over a period of several hours. Linear regression of the data with an intercept set at origin resulted  
3 in an  $R^2$  value of 0.982. This regression equation was used to correct DISCmini concentrations in  
4 emission factor calculations.

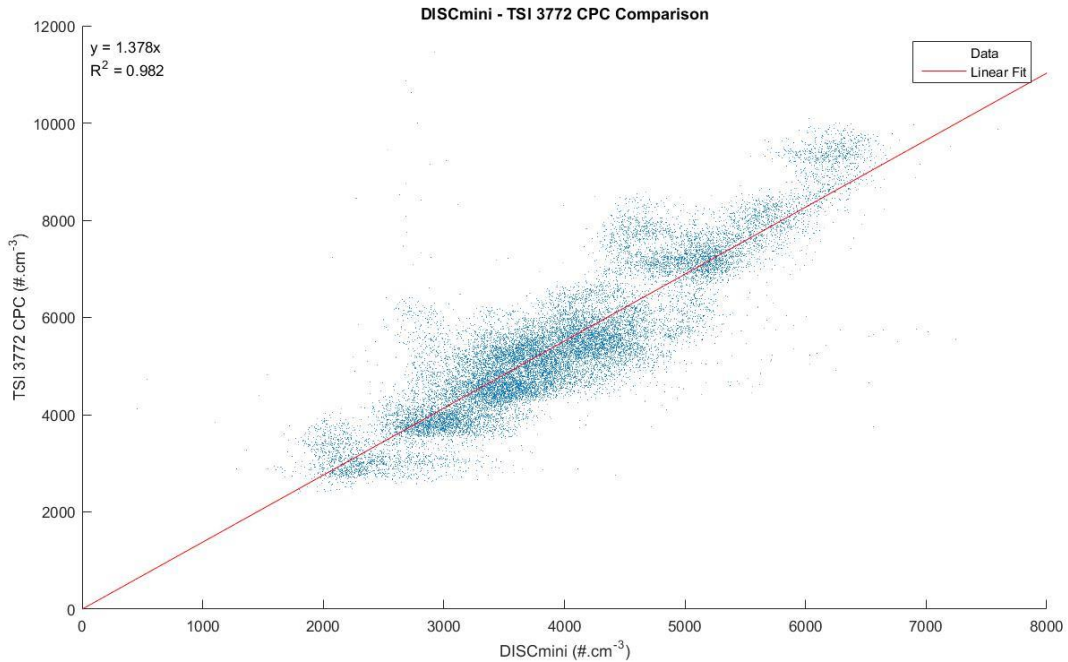

5  
6 **Figure S1: Comparison of the DISCmini with the CPC in the aerosol laboratory onboard the investigator.**

7  
8 The IAQ-calc 7545 was compared with a PICARRO Greenhouse Gas Analyzer for ambient measurements  
9 onboard the ship over a period of several hours. It was found there was a positive offset of  $93 \pm 2$  ppm  
10 (standard error) of between the two measurements.

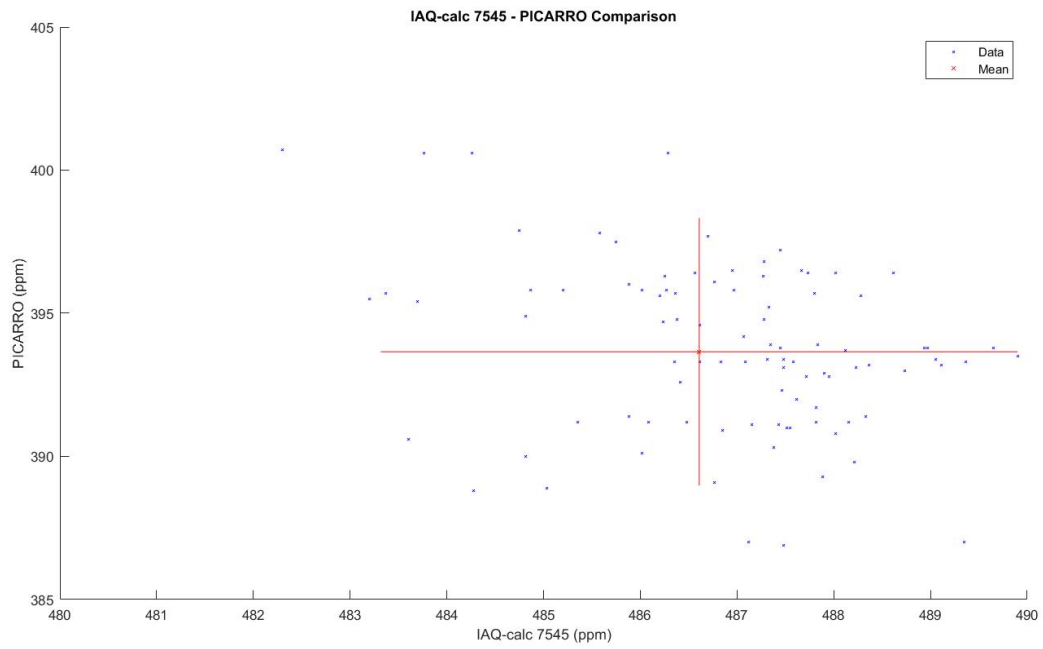

11

12 **Figure S2: Comparison of the IAQ-calc 7545 with the PICARRO in the aerosol laboratory onboard the investigator. Bars**  
13 **indicate the 95% confidence interval around the mean.**
